# Supplementary material for: A prominent gene activation role for C-terminal binding protein in mediating PcG/trxG proteins through Hox gene regulation
Source: Oxford University Press journal article supplement (doi:10.1242/dev.200153), 2022-06-01
Supplement: dev200153supp.pdf [file dev200153supp.pdf]

## Figure S1

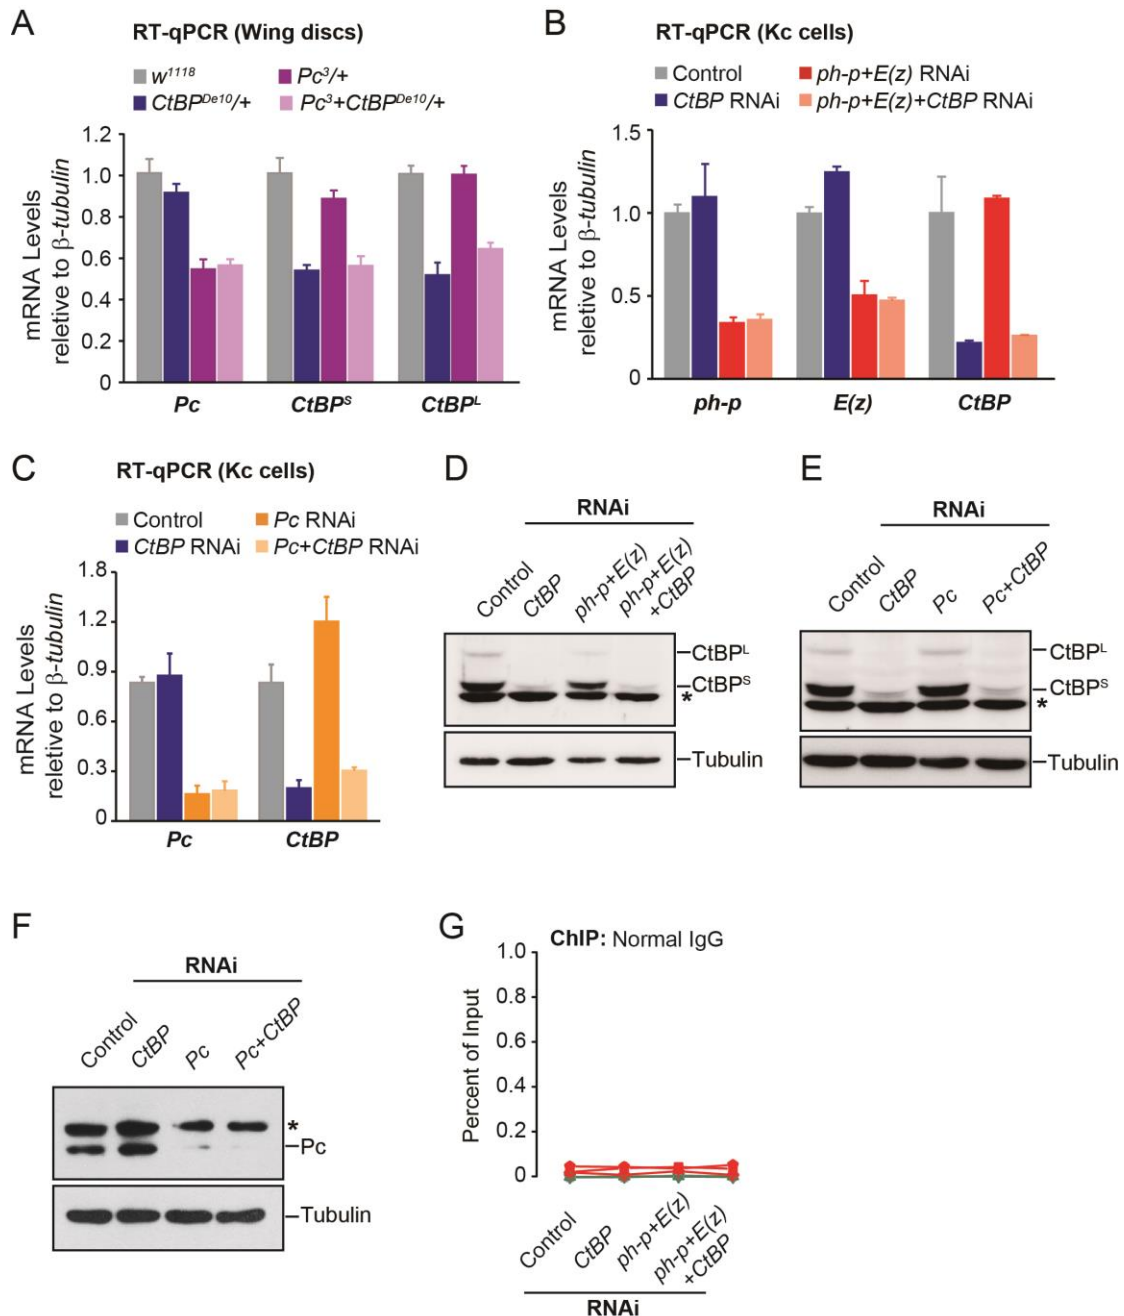

**Fig. S1. IgG ChIP controls and the verification of RNAi efficiency in wing discs and Kc cells.**

(A) RT-qPCR analysis of mRNA levels of *Pc* (A) and two *CtBP* transcripts [short (*CtBP<sup>S</sup>*) and long (*CtBP<sup>L</sup>*) forms] in the wing imaginal discs with genotypes indicated. (B-C) RT-qPCR analyses of mRNA levels (relative to  $\beta$ -*tubulin*) of genes in Kc cells with different combinations of RNAi treatments targeting *ph-p*, *E(z)*, *Pc* and *CtBP* and of control dsRNA, as indicated. (D-F) Verification of the protein levels of *Pc* and *CtBP* (*CtBP<sup>S</sup>* and *CtBP<sup>L</sup>*) in Kc cells subjected to different RNAi treatments as indicated. \* indicated the nonspecific signals. Note that all genes were efficiently knocked down within comparable levels upon the different RNAi treatments. (G) ChIP-qPCR signals of normal IgG were measured and expressed as in Figure 5-6.

**Figure S2**

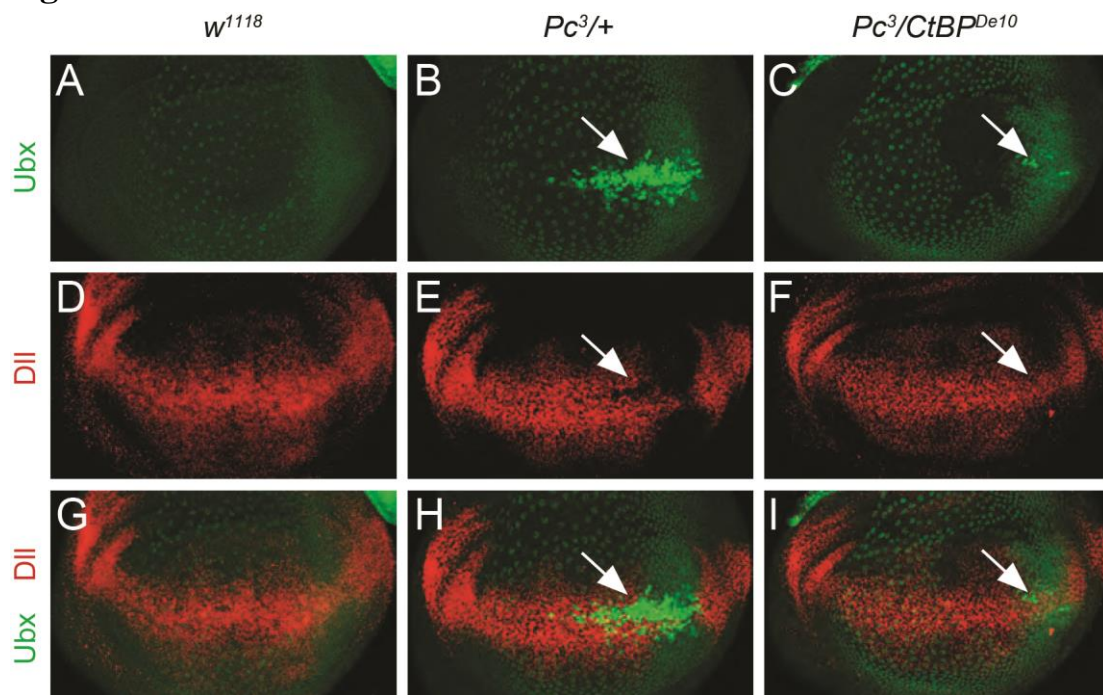

**Fig. S2. CtBP is required for Ubx to repress Dll expression in wing imaginal disc.**

(A-I) Representative confocal images of the late 3<sup>rd</sup> instar wing imaginal discs, with genotypes annotated above, stained for Ubx (A-C) and Distal-less (Dll, D-F). (G-I) are merged from (A-F). Note the complementation of ectopic Ubx and the reduced Dll signals (arrows).

## Figure S3

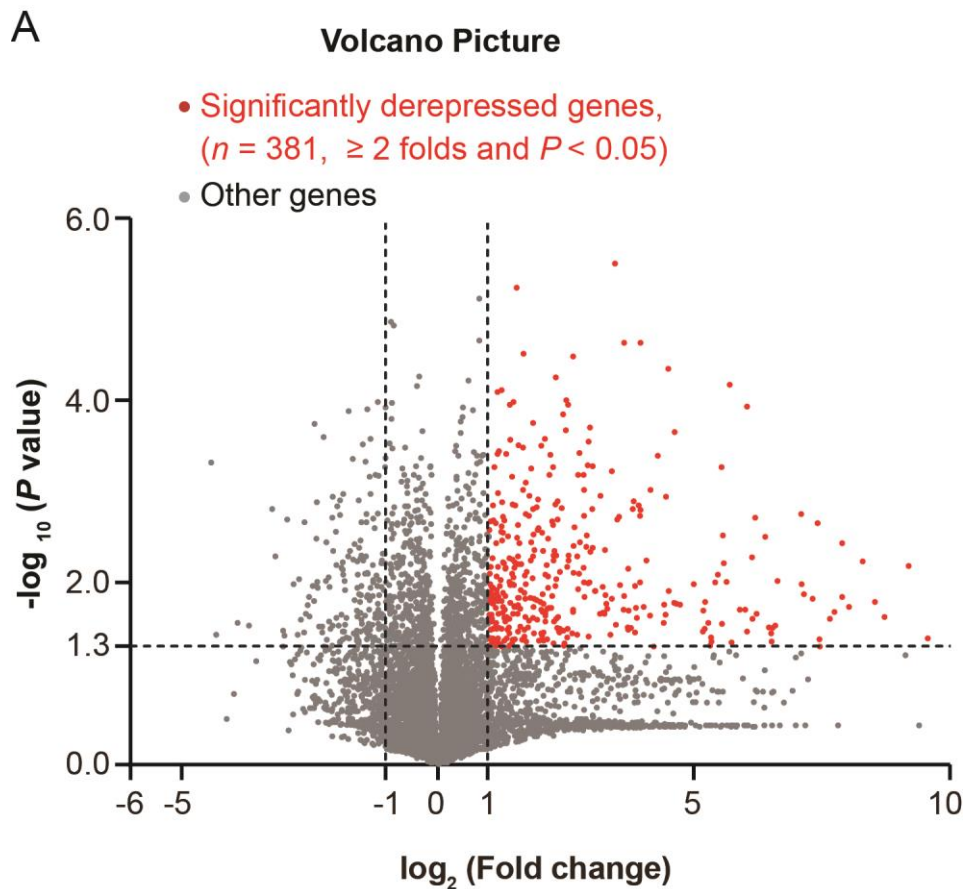

**Fig. S3. The selection of PcG repressed genes in Kc cells.**

(A) Volcano Plots of differentially expressed genes (DEG) between cells treated with control and *ph-p+E(z)* RNAi, as determined by the RNA-seq analysis pipeline (see Materials and Methods for detail). Of 11,282 genes with sound seq data, 381 were selected as PcG repressed genes (dots in red), based on the rule as indicated. The dashed lines indicate  $P = 0.05$ ,  $\log_2[\text{Fold change}] = -1$  and  $1$ , respectively.

## Figure S4

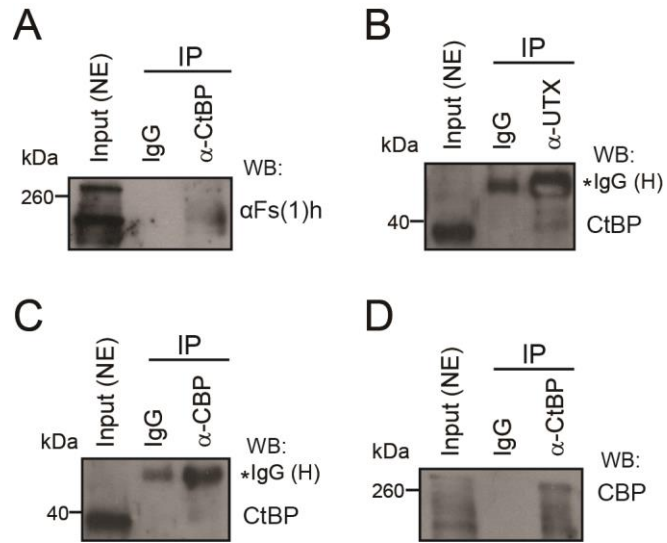

**Fig. S4. CtBP interacts with UTX, CBP and Fs(1)h.**

Western blots by antibodies indicated (to the right) of nuclear extracts (NE, 10% input), co-immunoprecipitates (IP) of normal IgG (IgG) and the indicated antibodies in Kc cells.

**Table S1.** List of primer sequences for dsRNA templates, RT-qPCR and ChIP analysis.

|       |                         |                                                                                                                                 |
|-------|-------------------------|---------------------------------------------------------------------------------------------------------------------------------|
| dsRNA | Control                 | GAATTAATACGACTCACTATAGGGAGAAT<br>GATTGAACAAGATGGATTGCACGCA;<br>GAATTAATACGACTCACTATAGGGAGAAAT<br>ATCACGGGTAGCCAACGCTATGTCCT.    |
|       | <i>CtBP</i>             | GAATTAATACGACTCACTATAGGGAGAAT<br>GCACAAAGCACCTCCGAAATACACGA;<br>GAATTAATACGACTCACTATAGGGAGAGC<br>ACCAGGTGCGCATCTGTTTAATTGTGAAT. |
|       | <i>Pc</i>               | GAATTAATACGACTCACTATAGGGAGAGCG<br>TTAAGAAGGGCGTCGTGGAGTACC;<br>GAATTAATACGACTCACTATAGGGAGAGGA<br>GTTACCTGCTGGGTCCGGCTGAGG.      |
|       | <i>ph-p</i>             | GAATTAATACGACTCACTATAGGGAGAGGT<br>CACAATTACCAACCAGAGCAGCACTCC;<br>GAATTAATACGACTCACTATAGGGAGACGT<br>GGTTGAAGTTGATGTTGCCGACG.    |
|       | <i>E(z)</i>             | GAATTAATACGACTCACTATAGGGAGACGA<br>GTCGAAGGTTTGGCAGGCTAAA;<br>GAATTAATACGACTCACTATAGGGAGATTCT<br>TCCACATCGGGCTTAACATCC.          |
|       | RT-qPCR                 | <i>β-tubulin56D</i>                                                                                                             |
|       | <i>CtBP</i>             | ACCTTACAATGGCGCACTGAA;<br>TGCGGTGTGCAAATCAGATT.                                                                                 |
|       | <i>CtBP<sup>S</sup></i> | AACGAACCTTACAATGGCGC;<br>GGTGTGCAAATCAGATTTGGG.                                                                                 |
|       | <i>CtBP<sup>L</sup></i> | CGCTTGAATTGTGAGTAGCC;<br>TCACCTCCGTTTTTATGCTCG.                                                                                 |
|       | <i>Pc</i>               | GTTCCAGCCCTTCCACTTGAC;<br>ATCATCCAAAAGCGCGTTAAG.                                                                                |
|       | <i>ph-p</i>             | AGCAACAGGCGACGAATCTC;<br>TTCTGCAGGGTGATCGGAGT.                                                                                  |
|       | <i>E(z)</i>             | GCCATCAGCGCTAACTTTCC;<br>TGGTGCTCCGTAAGCTCAATG.                                                                                 |
|       | <i>Antp</i>             | ATGGACCTCTGTCAGTCGG;<br>CAGGCGCAGTTGGGCTATAC.                                                                                   |
|       | <i>Ubx</i>              | AGAATCTCTTGCGGGCTCAC;<br>GCAGACCATTTGTACCTAGCCA.                                                                                |
|       | <i>abd-A</i>            | GTCGTTTGTGGCGATTTCAAC;<br>AAGCGAGTGTAGGTCTGGCG.                                                                                 |
|       | <i>Abd-B</i>            | CAGCGAGAACTACTCCAGCTCAG;<br>CACTGCTCCCACGGATAATC.                                                                               |
| ChIP  | Antp P1                 | TGGCGCGCTTCGATATAAAC;<br>CCAAACATCCACTTGCCGAC.                                                                                  |
|       | Antp P2                 | GCAGTCGGATGATTAATGGCA;<br>CATCCCATCTCCATTGCAG.                                                                                  |
|       | bx <sub>d</sub> PRE     | TAGTCTTATCTGTATCTCGCTCTTA;<br>CAGAACCAAAGTGCCGATAACTC.                                                                          |
|       | bx PRE                  | CCATAAGAAATGCCACTTTGC;<br>CTCTCACTCTCTCACTGTGAT.                                                                                |
|       | Ubx Pro                 | TCCAATCCGTTGCCATCGAACGAA;<br>TTAGGCCGAGTCGAGTGAGTTGAG.                                                                          |
|       | Ubx Int                 | CCGAACATGAGAGATGGAAAA;<br>AAAGTGCCGACAATGCAGTTA.                                                                                |

**Table S2.** List of 381 PcG repressed genes as in Figure 3A.

| <b>CtBP co-activated genes</b> |                          | <b>CtBP unaffected genes</b> |                          | <b>CtBP co-repressed genes</b> |                          |
|--------------------------------|--------------------------|------------------------------|--------------------------|--------------------------------|--------------------------|
| <b>Flybase ID</b>              | <b>Gene name (short)</b> | <b>Flybase ID</b>            | <b>Gene name (short)</b> | <b>Flybase ID</b>              | <b>Gene name (short)</b> |
| FBgn0000014                    | <i>abd-A</i>             | FBgn0000037                  | <i>mAcR-60C</i>          | FBgn0000071                    | <i>Ama</i>               |
| FBgn0000015                    | <i>Abd-B</i>             | FBgn0000043                  | <i>Act42A</i>            | FBgn0000099                    | <i>ap</i>                |
| FBgn0000157                    | <i>Dll</i>               | FBgn0000233                  | <i>btd</i>               | FBgn0000439                    | <i>Dfd</i>               |
| FBgn0000179                    | <i>bi</i>                | FBgn0000250                  | <i>cact</i>              | FBgn0000576                    | <i>ems</i>               |
| FBgn0000251                    | <i>cad</i>               | FBgn0000256                  | <i>capu</i>              | FBgn0000636                    | <i>Fas3</i>              |
| FBgn0000363                    | <i>cpo</i>               | FBgn0000320                  | <i>eya</i>               | FBgn0001235                    | <i>hth</i>               |
| FBgn0000459                    | <i>disco</i>             | FBgn0000337                  | <i>cn</i>                | FBgn0003053                    | <i>peb</i>               |
| FBgn0000490                    | <i>dpp</i>               | FBgn0000411                  | <i>D</i>                 | FBgn0003159                    | <i>ptr</i>               |
| FBgn0000659                    | <i>fkf</i>               | FBgn0000448                  | <i>Hr46</i>              | FBgn0003997                    | <i>W</i>                 |
| FBgn0001114                    | <i>Glt</i>               | FBgn0000489                  | <i>Pka-C3</i>            | FBgn0004858                    | <i>eIB</i>               |
| FBgn0001138                    | <i>grn</i>               | FBgn0001319                  | <i>kn</i>                | FBgn0011706                    | <i>rpr</i>               |
| FBgn0001147                    | <i>gsb-n</i>             | FBgn0001325                  | <i>Kr</i>                | FBgn0013771                    | <i>Cyp6a9</i>            |
| FBgn0002522                    | <i>lab</i>               | FBgn0001967                  | <i>nimC3</i>             | FBgn0013995                    | <i>Caix</i>              |
| FBgn0003067                    | <i>Pepck</i>             | FBgn0002576                  | <i>lz</i>                | FBgn0014019                    | <i>Rh5</i>               |
| FBgn0003423                    | <i>slgA</i>              | FBgn0002917                  | <i>na</i>                | FBgn0015575                    | <i>alpha-Est7</i>        |
| FBgn0003460                    | <i>so</i>                | FBgn0002931                  | <i>net</i>               | FBgn0015766                    | <i>Msr-110</i>           |
| FBgn0003495                    | <i>spz</i>               | FBgn0002945                  | <i>nkd</i>               | FBgn0016675                    | <i>Lectin-galC1</i>      |
| FBgn0003513                    | <i>ss</i>                | FBgn0002973                  | <i>numb</i>              | FBgn0019643                    | <i>Dat</i>               |
| FBgn0003651                    | <i>svp</i>               | FBgn0003002                  | <i>opa</i>               | FBgn0020415                    | <i>ldgf2</i>             |
| FBgn0003717                    | <i>Tl</i>                | FBgn0003117                  | <i>pnr</i>               | FBgn0020762                    | <i>Atet</i>              |
| FBgn0003866                    | <i>tsh</i>               | FBgn0003254                  | <i>rib</i>               | FBgn0024290                    | <i>Slob</i>              |
| FBgn0003944                    | <i>Ubx</i>               | FBgn0003435                  | <i>sm</i>                | FBgn0026315                    | <i>Ugt35a</i>            |
| FBgn0003975                    | <i>vg</i>                | FBgn0003463                  | <i>sog</i>               | FBgn0026415                    | <i>ldgf4</i>             |
| FBgn0004102                    | <i>oc</i>                | FBgn0003749                  | <i>trh</i>               | FBgn0027070                    | <i>CG17322</i>           |
| FBgn0004360                    | <i>Wnt2</i>              | FBgn0003969                  | <i>vap</i>               | FBgn0027356                    | <i>Amph</i>              |
| FBgn0004394                    | <i>pdm2</i>              | FBgn0004009                  | <i>wg</i>                | FBgn0027556                    | <i>CG4928</i>            |
| FBgn0004435                    | <i>Galpha49B</i>         | FBgn0004575                  | <i>Syn</i>               | FBgn0030156                    | <i>CG15247</i>           |
| FBgn0004567                    | <i>slp2</i>              | FBgn0005624                  | <i>Psc</i>               | FBgn0030160                    | <i>CG9691</i>            |
| FBgn0004579                    | <i>salm</i>              | FBgn0008646                  | <i>E5</i>                | FBgn0031362                    | <i>CG17646</i>           |
| FBgn0004595                    | <i>pros</i>              | FBgn0008654                  | <i>Su(z)2</i>            | FBgn0031791                    | <i>CG9486</i>            |
| FBgn0004607                    | <i>zfh2</i>              | FBgn0010225                  | <i>Gel</i>               | FBgn0032318                    | <i>CG14072</i>           |
| FBgn0004629                    | <i>Cys</i>               | FBgn0010313                  | <i>corto</i>             | FBgn0032422                    | <i>CG6579</i>            |
| FBgn0004795                    | <i>retn</i>              | FBgn0010381                  | <i>Drs</i>               | FBgn0032843                    | <i>CG10730</i>           |
| FBgn0005677                    | <i>dac</i>               | FBgn0010453                  | <i>Wnt4</i>              | FBgn0032886                    | <i>CG9328</i>            |
| FBgn0011722                    | <i>Tig</i>               | FBgn0010768                  | <i>sqz</i>               | FBgn0032897                    | <i>CG9336</i>            |
| FBgn0013763                    | <i>Chit</i>              | FBgn0013469                  | <i>klu</i>               | FBgn0032899                    | <i>CG9338</i>            |
| FBgn0013772                    | <i>Cyp6a8</i>            | FBgn0015872                  | <i>Drip</i>              | FBgn0033408                    | <i>CG8800</i>            |
| FBgn0013953                    | <i>Esp</i>               | FBgn0016059                  | <i>Sema-1b</i>           | FBgn0033504                    | <i>CAP</i>               |
| FBgn0014343                    | <i>mirr</i>              | FBgn0016660                  | <i>H15</i>               | FBgn0033981                    | <i>Cyp6a21</i>           |
| FBgn0015561                    | <i>unpg</i>              | FBgn0016930                  | <i>smi35A</i>            | FBgn0034198                    | <i>CG11400</i>           |
| FBgn0015576                    | <i>alpha-Est8</i>        | FBgn0020307                  | <i>dve</i>               | FBgn0034199                    | <i>CG15917</i>           |
| FBgn0015903                    | <i>apt</i>               | FBgn0020416                  | <i>ldgf1</i>             | FBgn0034200                    | <i>CG11395</i>           |
| FBgn0020445                    | <i>E23</i>               | FBgn0024150                  | <i>Ac78C</i>             | FBgn0034429                    | <i>CG18607</i>           |
| FBgn0020546                    | <i>iab-4</i>             | FBgn0024288                  | <i>Sox100B</i>           | FBgn0034733                    | <i>CG4752</i>            |
| FBgn0020912                    | <i>Ptx1</i>              | FBgn0024980                  | <i>Syx4</i>              | FBgn0035508                    | <i>CG15005</i>           |
| FBgn0023441                    | <i>fus</i>               | FBgn0025525                  | <i>bab2</i>              | FBgn0035975                    | <i>PGRP-LA</i>           |
| FBgn0024184                    | <i>unc-4</i>             | FBgn0025680                  | <i>cry</i>               | FBgn0036419                    | <i>CG13482</i>           |
| FBgn0024244                    | <i>drm</i>               | FBgn0026063                  | <i>KP78b</i>             | FBgn0036493                    | <i>CG7255</i>            |
| FBgn0025578                    | <i>Lcp9</i>              | FBgn0026189                  | <i>prominin-like</i>     | FBgn0036782                    | <i>CG7320</i>            |

Table S2. Continued.

| <b>CtBP co-activated genes</b> |                          | <b>CtBP unaffected genes</b> |                          | <b>CtBP co-repressed genes</b> |                          |
|--------------------------------|--------------------------|------------------------------|--------------------------|--------------------------------|--------------------------|
| <b>Flybase ID</b>              | <b>Gene name (short)</b> | <b>Flybase ID</b>            | <b>Gene name (short)</b> | <b>Flybase ID</b>              | <b>Gene name (short)</b> |
| FBgn0025693                    | CG11163                  | FBgn0027348                  | <i>bgm</i>               | FBgn0037163                    | <i>laza</i>              |
| FBgn0026064                    | <i>KP78a</i>             | FBgn0027600                  | <i>obst-B</i>            | FBgn0037166                    | CG11426                  |
| FBgn0026411                    | <i>Lim1</i>              | FBgn0028550                  | <i>A3-3</i>              | FBgn0037515                    | <i>Sp7</i>               |
| FBgn0027578                    | CG14526                  | FBgn0028979                  | <i>tio</i>               | FBgn0038088                    | CG10126                  |
| FBgn0027929                    | <i>nimB1</i>             | FBgn0029123                  | <i>SoxN</i>              | FBgn0038150                    | <i>yellow-e3</i>         |
| FBgn0028519                    | CG4500                   | FBgn0029895                  | CG14441                  | FBgn0038151                    | <i>yellow-e2</i>         |
| FBgn0028542                    | <i>nimB4</i>             | FBgn0030090                  | <i>fend</i>              | FBgn0038179                    | CG9312                   |
| FBgn0028543                    | <i>nimB2</i>             | FBgn0030296                  | CG15196                  | FBgn0038198                    | <i>Npc2b</i>             |
| FBgn0028936                    | <i>nimB5</i>             | FBgn0030340                  | CG15740                  | FBgn0038261                    | CG14856                  |
| FBgn0028940                    | <i>Cyp28a5</i>           | FBgn0030722                  | CG12395                  | FBgn0038262                    | CG14857                  |
| FBgn0029003                    | <i>mab-21</i>            | FBgn0030839                  | CG5613                   | FBgn0038353                    | CG5399                   |
| FBgn0029703                    | CG12692                  | FBgn0031080                  | CG12655                  | FBgn0038391                    | GATAe                    |
| FBgn0029775                    | <i>Vsx1</i>              | FBgn0031081                  | <i>Nep3</i>              | FBgn0038720                    | CG6231                   |
| FBgn0030452                    | CG4330                   | FBgn0031170                  | CG1718                   | FBgn0039075                    | CG4393                   |
| FBgn0030723                    | <i>dpr18</i>             | FBgn0031397                  | CG15385                  | FBgn0039905                    | CG2052                   |
| FBgn0030796                    | CG4829                   | FBgn0031910                  | CG15818                  | FBgn0040730                    | CG15127                  |
| FBgn0030816                    | CG16700                  | FBgn0031920                  | CG6441                   | FBgn0040732                    | CG16926                  |
| FBgn0031327                    | CG5397                   | FBgn0031927                  | CG13792                  | FBgn0040827                    | CG13315                  |
| FBgn0031389                    | CG4259                   | FBgn0031970                  | CG7227                   | FBgn0041711                    | <i>yellow-e</i>          |
| FBgn0031547                    | <i>Sr-CIV</i>            | FBgn0031993                  | CG8486                   | FBgn0042696                    | <i>Nfi</i>               |
| FBgn0031646                    | CG2837                   | FBgn0032120                  | CG33298                  | FBgn0045064                    | <i>bwa</i>               |
| FBgn0031695                    | <i>Cyp4ac3</i>           | FBgn0032265                  | CG18301                  | FBgn0050438                    | CG30438                  |
| FBgn0031914                    | CG5973                   | FBgn0032935                  | CG8678                   | FBgn0050456                    | CG30456                  |
| FBgn0031923                    | CG13791                  | FBgn0033649                  | <i>pyr</i>               | FBgn0051116                    | CG31116                  |
| FBgn0032086                    | CG17906                  | FBgn0033756                  | CG17760                  | FBgn0051287                    | CG31287                  |
| FBgn0032124                    | CG17855                  | FBgn0033787                  | CG13321                  | FBgn0051313                    | CG31313                  |
| FBgn0032493                    | CG15479                  | FBgn0033791                  | <i>Drl-2</i>             | FBgn0051436                    | CG31436                  |
| FBgn0032946                    | <i>nrv3</i>              | FBgn0034194                  | CG15611                  | FBgn0051454                    | CG31454                  |
| FBgn0032955                    | CG2201                   | FBgn0034195                  | CG10956                  | FBgn0053555                    | <i>btsz</i>              |
| FBgn0032978                    | CG15216                  | FBgn0034196                  | CG15605                  | FBgn0083919                    | <i>Zasp52</i>            |
| FBgn0033042                    | <i>Tsp42A</i>            | FBgn0034219                  | <i>mthl4</i>             | FBgn0085227                    | CG34198                  |
| FBgn0033065                    | <i>Cyp6w1</i>            | FBgn0034389                  | <i>Mctp</i>              | FBgn0259175                    | <i>ome</i>               |
| FBgn0033250                    | CG14762                  | FBgn0034417                  | CG15117                  | FBgn0259244                    | CG42342                  |
| FBgn0033387                    | CG8008                   | FBgn0034428                  | CG18606                  | FBgn0259736                    | CG42390                  |
| FBgn0033483                    | <i>egr</i>               | FBgn0034476                  | <i>Toll-7</i>            | FBgn0260000                    | CG17570                  |
| FBgn0033635                    | CG7777                   | FBgn0034883                  | CG17664                  | FBgn0260005                    | <i>wtrw</i>              |
| FBgn0033857                    | CG13335                  | FBgn0035146                  | CG13893                  |                                |                          |
| FBgn0033939                    | <i>Oaz</i>               | FBgn0035262                  | CG18171                  |                                |                          |
| FBgn0034010                    | CG8157                   | FBgn0035412                  | CG14957                  |                                |                          |
| FBgn0034085                    | <i>Ptp52F</i>            | FBgn0035454                  | CG12029                  |                                |                          |
| FBgn0034126                    | CG4398                   | FBgn0035976                  | <i>PGRP-LC</i>           |                                |                          |
| FBgn0034140                    | CG8317                   | FBgn0035977                  | <i>PGRP-LF</i>           |                                |                          |
| FBgn0034221                    | CG10764                  | FBgn0036359                  | CG14105                  |                                |                          |
| FBgn0034810                    | CG9895                   | FBgn0036377                  | CG10710                  |                                |                          |
| FBgn0034834                    | CG3162                   | FBgn0036381                  | CG8745                   |                                |                          |
| FBgn0034957                    | CG3121                   | FBgn0036494                  | <i>Toll-6</i>            |                                |                          |
| FBgn0034985                    | CG3328                   | FBgn0037005                  | CG5078                   |                                |                          |
| FBgn0035282                    | CG13936                  | FBgn0037060                  | CG10508                  |                                |                          |
| FBgn0035453                    | CG10357                  | FBgn0037698                  | CG16779                  |                                |                          |
| FBgn0035583                    | CG13704                  | FBgn0037989                  | CG14741                  |                                |                          |
| FBgn0035623                    | <i>mthl2</i>             | FBgn0038243                  | CG8066                   |                                |                          |

Table S2. Continued.

| CtBP co-activated genes |                    | CtBP unaffected genes |                    | CtBP co-repressed genes |                   |
|-------------------------|--------------------|-----------------------|--------------------|-------------------------|-------------------|
| Flybase ID              | Gene name (short)  | Flybase ID            | Gene name (short)  | Flybase ID              | Gene name (short) |
| FBgn0036620             | CG4842             | FBgn0038416           | CG17930            |                         |                   |
| FBgn0036904             | <i>trpm1</i>       | FBgn0039060           | CG13836            |                         |                   |
| FBgn0036956             | CG13813            | FBgn0039067           | <i>wda</i>         |                         |                   |
| FBgn0037222             | CG14642            | FBgn0039068           | CG13827            |                         |                   |
| FBgn0037223             | <i>TwdIU</i>       | FBgn0039648           | CG14515            |                         |                   |
| FBgn0037228             | CG1092             | FBgn0039818           | CG11318            |                         |                   |
| FBgn0037487             | CG14608            | FBgn0039927           | CG11155            |                         |                   |
| FBgn0037937             | <i>Fer3</i>        | FBgn0039938           | <i>Sox102F</i>     |                         |                   |
| FBgn0037941             | CG12594            | FBgn0040503           | CG7763             |                         |                   |
| FBgn0038237             | <i>Pde6</i>        | FBgn0041087           | <i>wun2</i>        |                         |                   |
| FBgn0038832             | CG15695            | FBgn0041229           | <i>Gr93a</i>       |                         |                   |
| FBgn0039000             | CG6954             | FBgn0043806           | CG32032            |                         |                   |
| FBgn0039226             | CG18410            | FBgn0046776           | CG14033            |                         |                   |
| FBgn0039611             | CG14528            | FBgn0050151           | CG30151            |                         |                   |
| FBgn0039756             | CG9743             | FBgn0051053           | CG31053            |                         |                   |
| FBgn0040384             | CG32795            | FBgn0051217           | <i>modSP</i>       |                         |                   |
| FBgn0040502             | CG8343             | FBgn0051778           | CG31778            |                         |                   |
| FBgn0040813             | <i>Nplp2</i>       | FBgn0051999           | CG31999            |                         |                   |
| FBgn0041233             | <i>Gr59e</i>       | FBgn0052121           | CG32121            |                         |                   |
| FBgn0041234             | <i>Gr59f</i>       | FBgn0052407           | CG32407            |                         |                   |
| FBgn0041629             | <i>Hexo2</i>       | FBgn0052712           | CG32712            |                         |                   |
| FBgn0042105             | CG18748            | FBgn0052987           | CG32987            |                         |                   |
| FBgn0042650             | <i>disco-r</i>     | FBgn0052988           | CG32988            |                         |                   |
| FBgn0050043             | CG30043            | FBgn0053173           | CG33173            |                         |                   |
| FBgn0050054             | CG30054            | FBgn0053533           | <i>lectin-37Db</i> |                         |                   |
| FBgn0050089             | CG30089            | FBgn0053758           | CG33758            |                         |                   |
| FBgn0050090             | CG30090            | FBgn0053980           | <i>Vsx2</i>        |                         |                   |
| FBgn0050461             | CG30461            | FBgn0054003           | <i>nimB3</i>       |                         |                   |
| FBgn0050463             | CG30463            | FBgn0060296           | <i>pain</i>        |                         |                   |
| FBgn0051038             | CG31038            | FBgn0083973           | CG34137            |                         |                   |
| FBgn0051051             | CG31051            | FBgn0085218           | CG34189            |                         |                   |
| FBgn0052843             | <i>Dh31-R1</i>     | FBgn0085403           | <i>Rapgap1</i>     |                         |                   |
| FBgn0053460             | CG33460            | FBgn0085409           | CG34380            |                         |                   |
| FBgn0053465             | CG33465            | FBgn0086677           | <i>jeb</i>         |                         |                   |
| FBgn0053532             | <i>lectin-37Da</i> | FBgn0250907           | <i>Cht3</i>        |                         |                   |
| FBgn0053960             | CG33960            | FBgn0259211           | <i>grh</i>         |                         |                   |
| FBgn0053993             | CG33993            | FBgn0259699           | CG42353            |                         |                   |
| FBgn0054054             | CG34054            | FBgn0260011           | <i>nimC4</i>       |                         |                   |
| FBgn0065110             | <i>ppk10</i>       | FBgn0260429           | CG42524            |                         |                   |
| FBgn0085419             | <i>Rgk2</i>        | FBgn0261059           | <i>Sfp78E</i>      |                         |                   |
| FBgn0085424             | <i>nub</i>         | FBgn0261260           | CG42611            |                         |                   |
| FBgn0086680             | <i>vvl</i>         | FBgn0261287           | <i>ymp</i>         |                         |                   |
| FBgn0243514             | <i>eater</i>       | FBgn0261545           | CG42663            |                         |                   |
| FBgn0250821             | CG14644            |                       |                    |                         |                   |
| FBgn0259192             | CG42296            |                       |                    |                         |                   |
| FBgn0259240             | <i>Ten-a</i>       |                       |                    |                         |                   |
| FBgn0259241             | CG42339            |                       |                    |                         |                   |
| FBgn0259715             | CG42369            |                       |                    |                         |                   |
| FBgn0259739             | CG42393            |                       |                    |                         |                   |
| FBgn0259794             | <i>sinah</i>       |                       |                    |                         |                   |
| FBgn0259896             | <i>nimC1</i>       |                       |                    |                         |                   |
| FBgn0260642             | <i>Antp</i>        |                       |                    |                         |                   |
| FBgn0261451             | <i>trol</i>        |                       |                    |                         |                   |



**Table S3.** List of 73 PcG targets.

| <b>CtBP-associated PcG targets</b> |                          | <b>CtBP-unassociated PcG targets</b> |                          |
|------------------------------------|--------------------------|--------------------------------------|--------------------------|
| <b>Flybase ID</b>                  | <b>Gene name (short)</b> | <b>Flybase ID</b>                    | <b>Gene name (short)</b> |
| FBgn0001147                        | <i>gsb-n</i>             | FBgn0000071                          | <i>Ama</i>               |
| FBgn0052988                        | CG32988                  | FBgn0038391                          | <i>GATAe</i>             |
| FBgn0000490                        | <i>dpp</i>               | FBgn0000099                          | <i>ap</i>                |
| FBgn0003975                        | <i>vg</i>                | FBgn0000411                          | <i>D</i>                 |
| FBgn0034810                        | CG9895                   | FBgn0000576                          | <i>ems</i>               |
| FBgn0020912                        | <i>Ptx1</i>              | FBgn0003053                          | <i>peb</i>               |
| FBgn0004795                        | <i>retn</i>              | FBgn0000439                          | <i>Dfd</i>               |
| FBgn0001138                        | <i>grn</i>               | FBgn0001235                          | <i>hth</i>               |
| FBgn0003651                        | <i>svp</i>               |                                      |                          |
| FBgn0029003                        | <i>mab-21</i>            |                                      |                          |
| FBgn0004394                        | <i>pdm2</i>              |                                      |                          |
| FBgn0000037                        | <i>mAcR-60C</i>          |                                      |                          |
| FBgn0014343                        | <i>mirr</i>              |                                      |                          |
| FBgn0023441                        | <i>fus</i>               |                                      |                          |
| FBgn0003460                        | <i>so</i>                |                                      |                          |
| FBgn0024184                        | <i>unc-4</i>             |                                      |                          |
| FBgn0002522                        | <i>lab</i>               |                                      |                          |
| FBgn0000014                        | <i>abd-A</i>             |                                      |                          |
| FBgn0003513                        | <i>ss</i>                |                                      |                          |
| FBgn0000015                        | <i>Abd-B</i>             |                                      |                          |
| FBgn0029775                        | <i>Vsx1</i>              |                                      |                          |
| FBgn0260642                        | <i>Antp</i>              |                                      |                          |
| FBgn0015561                        | <i>unpg</i>              |                                      |                          |
| FBgn0000179                        | <i>bi</i>                |                                      |                          |
| FBgn0026411                        | <i>Lim1</i>              |                                      |                          |
| FBgn0003944                        | <i>Ubx</i>               |                                      |                          |
| FBgn0034883                        | CG17664                  |                                      |                          |
| FBgn0042650                        | <i>disco-r</i>           |                                      |                          |
| FBgn0003254                        | <i>rib</i>               |                                      |                          |
| FBgn0029123                        | <i>SoxN</i>              |                                      |                          |
| FBgn0025525                        | <i>bab2</i>              |                                      |                          |
| FBgn0033787                        | CG13321                  |                                      |                          |
| FBgn0008654                        | <i>Su(z)2</i>            |                                      |                          |
| FBgn0002576                        | <i>lz</i>                |                                      |                          |
| FBgn0016660                        | <i>H15</i>               |                                      |                          |
| FBgn0001325                        | <i>Kr</i>                |                                      |                          |
| FBgn0053980                        | <i>Vsx2</i>              |                                      |                          |
| FBgn0005677                        | <i>dac</i>               |                                      |                          |
| FBgn0004579                        | <i>salm</i>              |                                      |                          |
| FBgn0004567                        | <i>slp2</i>              |                                      |                          |
| FBgn0000157                        | <i>Dll</i>               |                                      |                          |
| FBgn0004607                        | <i>zfh2</i>              |                                      |                          |
| FBgn0000459                        | <i>disco</i>             |                                      |                          |
| FBgn0004595                        | <i>pros</i>              |                                      |                          |
| FBgn0033250                        | CG14762                  |                                      |                          |
| FBgn0001319                        | <i>kn</i>                |                                      |                          |
| FBgn0003423                        | <i>slgA</i>              |                                      |                          |
| FBgn0015903                        | <i>apt</i>               |                                      |                          |
| FBgn0000659                        | <i>fkf</i>               |                                      |                          |
| FBgn0003002                        | <i>opa</i>               |                                      |                          |
| FBgn0000251                        | <i>cad</i>               |                                      |                          |
| FBgn0003749                        | <i>trh</i>               |                                      |                          |
| FBgn0013469                        | <i>klu</i>               |                                      |                          |
| FBgn0026063                        | <i>KP78b</i>             |                                      |                          |
| FBgn0026064                        | <i>KP78a</i>             |                                      |                          |
| FBgn0004102                        | <i>oc</i>                |                                      |                          |
| FBgn0052987                        | CG32987                  |                                      |                          |
| FBgn0086680                        | <i>vvl</i>               |                                      |                          |
| FBgn0008646                        | <i>E5</i>                |                                      |                          |
| FBgn0003117                        | <i>pnr</i>               |                                      |                          |
| FBgn0004009                        | <i>wg</i>                |                                      |                          |
| FBgn0024244                        | <i>drm</i>               |                                      |                          |
| FBgn0259211                        | <i>grh</i>               |                                      |                          |
| FBgn0005624                        | <i>Psc</i>               |                                      |                          |
| FBgn0024288                        | <i>Sox100B</i>           |                                      |                          |

Note: The genes are listed in the order of heatmaps in Figure 4B.

**Table S4.** List of *P* value as in Figure 5 B-G and Figure 6 A-B.**Supplemental Table 4-1.** List of *P* value for data in Figure 5B

|                               | <i>P</i> value of ANOVA | Adjusted <i>P</i> value (post-hoc) |                                      |                                           |                                          |                                               |                                                  |
|-------------------------------|-------------------------|------------------------------------|--------------------------------------|-------------------------------------------|------------------------------------------|-----------------------------------------------|--------------------------------------------------|
|                               |                         | <i>CtBP</i> RNAi VS. Control RNAi  | <i>Ph+E(z)</i> RNAi VS. Control RNAi | <i>Ph+E(z)+CtBP</i> RNAi VS. Control RNAi | <i>Ph+E(z)</i> RNAi VS. <i>CtBP</i> RNAi | <i>Ph+E(z)+CtBP</i> RNAi VS. <i>CtBP</i> RNAi | <i>Ph+E(z)+CtBP</i> RNAi VS. <i>Ph+E(z)</i> RNAi |
| PRE ( <i>Antp</i> )           | 0.0027                  | 0.0136                             | 0.9199                               | 0.0336                                    | 0.0061                                   | 0.9076                                        | 0.0143                                           |
| Promoter/ PRE ( <i>Antp</i> ) | 0.0007                  | 0.0011                             | 0.0251                               | 0.0011                                    | 0.1161                                   | > 0.9999                                      | 0.1258                                           |
| PRE ( <i>bx</i> )             | 0.0404                  | 0.0649                             | 0.9528                               | 0.1198                                    | 0.1342                                   | 0.9707                                        | 0.2423                                           |
| Promoter ( <i>Ubx</i> )       | 0.0034                  | 0.0068                             | 0.0131                               | 0.0047                                    | 0.9542                                   | 0.9908                                        | 0.8522                                           |
| PRE ( <i>bx<sub>d</sub></i> ) | 0.0793                  |                                    |                                      |                                           |                                          |                                               |                                                  |

**Supplemental Table 4-2.** List of *P* value for data in Figure 5C

|                               | <i>P</i> value of ANOVA | Adjusted <i>P</i> value (post-hoc) |                                      |                                           |                                          |                                               |                                                  |
|-------------------------------|-------------------------|------------------------------------|--------------------------------------|-------------------------------------------|------------------------------------------|-----------------------------------------------|--------------------------------------------------|
|                               |                         | <i>CtBP</i> RNAi VS. Control RNAi  | <i>Ph+E(z)</i> RNAi VS. Control RNAi | <i>Ph+E(z)+CtBP</i> RNAi VS. Control RNAi | <i>Ph+E(z)</i> RNAi VS. <i>CtBP</i> RNAi | <i>Ph+E(z)+CtBP</i> RNAi VS. <i>CtBP</i> RNAi | <i>Ph+E(z)+CtBP</i> RNAi VS. <i>Ph+E(z)</i> RNAi |
| PRE ( <i>Antp</i> )           | 0.0002                  | 0.0041                             | 0.0001                               | 0.0014                                    | 0.0433                                   | 0.7985                                        | 0.1565                                           |
| Promoter/ PRE ( <i>Antp</i> ) | < 0.0001                | < 0.0001                           | < 0.0001                             | < 0.0001                                  | 0.0048                                   | 0.4000                                        | 0.0430                                           |
| PRE ( <i>bx</i> )             | < 0.0001                | 0.0045                             | < 0.0001                             | 0.0009                                    | 0.0009                                   | 0.5263                                        | 0.0044                                           |
| Promoter ( <i>Ubx</i> )       | 0.0628                  |                                    |                                      |                                           |                                          |                                               |                                                  |
| PRE ( <i>bx<sub>d</sub></i> ) | 0.0034                  | 0.7009                             | 0.0029                               | 0.2774                                    | 0.0112                                   | 0.8227                                        | 0.0362                                           |

**Supplemental Table 4-3.** List of *P* value for data in Figure 5D

|                               | <i>P</i> value of ANOVA | Adjusted <i>P</i> value (post-hoc) |                                      |                                           |                                          |                                               |                                                  |
|-------------------------------|-------------------------|------------------------------------|--------------------------------------|-------------------------------------------|------------------------------------------|-----------------------------------------------|--------------------------------------------------|
|                               |                         | <i>CtBP</i> RNAi VS. Control RNAi  | <i>Ph+E(z)</i> RNAi VS. Control RNAi | <i>Ph+E(z)+CtBP</i> RNAi VS. Control RNAi | <i>Ph+E(z)</i> RNAi VS. <i>CtBP</i> RNAi | <i>Ph+E(z)+CtBP</i> RNAi VS. <i>CtBP</i> RNAi | <i>Ph+E(z)+CtBP</i> RNAi VS. <i>Ph+E(z)</i> RNAi |
| PRE ( <i>Antp</i> )           | 0.0102                  | 0.2414                             | 0.0078                               | 0.6453                                    | 0.1321                                   | 0.8192                                        | 0.0387                                           |
| Promoter/ PRE ( <i>Antp</i> ) | 0.0030                  | 0.0809                             | 0.0018                               | 0.0547                                    | 0.0708                                   | 0.9919                                        | 0.1048                                           |
| PRE ( <i>bx</i> )             | 0.0201                  | 0.2470                             | 0.0127                               | 0.2182                                    | 0.2163                                   | 0.9997                                        | 0.2448                                           |
| Promoter ( <i>Ubx</i> )       | 0.0039                  | 0.0793                             | 0.0026                               | 0.2661                                    | 0.1142                                   | 0.8143                                        | 0.0330                                           |
| PRE ( <i>bx<sub>d</sub></i> ) | 0.0128                  | 0.7267                             | 0.0350                               | 0.8312                                    | 0.1530                                   | 0.3011                                        | 0.0111                                           |

**Supplemental Table 4-4.** List of *P* value for data in Figure 5E

|                               | <i>P</i> value of ANOVA | Adjusted <i>P</i> value (post-hoc) |                                      |                                           |                                          |                                               |                                                  |
|-------------------------------|-------------------------|------------------------------------|--------------------------------------|-------------------------------------------|------------------------------------------|-----------------------------------------------|--------------------------------------------------|
|                               |                         | <i>CtBP</i> RNAi VS. Control RNAi  | <i>Ph+E(z)</i> RNAi VS. Control RNAi | <i>Ph+E(z)+CtBP</i> RNAi VS. Control RNAi | <i>Ph+E(z)</i> RNAi VS. <i>CtBP</i> RNAi | <i>Ph+E(z)+CtBP</i> RNAi VS. <i>CtBP</i> RNAi | <i>Ph+E(z)+CtBP</i> RNAi VS. <i>Ph+E(z)</i> RNAi |
| PRE ( <i>Antp</i> )           | 0.0004                  | 0.5788                             | 0.0019                               | > 0.9999                                  | 0.0005                                   | 0.5811                                        | 0.0019                                           |
| Promoter/ PRE ( <i>Antp</i> ) | 0.0008                  | 0.9969                             | 0.002                                | 0.9943                                    | 0.0016                                   | > 0.9999                                      | 0.0015                                           |
| PRE ( <i>bx</i> )             | < 0.0001                | 0.1209                             | < 0.0001                             | 0.0448                                    | < 0.0001                                 | 0.8923                                        | < 0.0001                                         |
| Promoter ( <i>Ubx</i> )       | 0.0493                  | 0.997                              | 0.075                                | > 0.9999                                  | 0.0991                                   | 0.9964                                        | 0.0736                                           |
| PRE ( <i>bx<sub>d</sub></i> ) | 0.0017                  | > 0.9999                           | 0.0035                               | 0.9998                                    | 0.0037                                   | > 0.9999                                      | 0.0039                                           |

**Table S4. Continued.****Supplemental Table 4-5.** List of *P* value for data in Figure 5F

|                               | <i>P</i> value of ANOVA | Adjusted <i>P</i> value (post-hoc) |                                      |                                           |                                          |                                               |                                                  |
|-------------------------------|-------------------------|------------------------------------|--------------------------------------|-------------------------------------------|------------------------------------------|-----------------------------------------------|--------------------------------------------------|
|                               |                         | <i>CtBP</i> RNAi VS. Control RNAi  | <i>Ph+E(z)</i> RNAi VS. Control RNAi | <i>Ph+E(z)+CtBP</i> RNAi VS. Control RNAi | <i>Ph+E(z)</i> RNAi VS. <i>CtBP</i> RNAi | <i>Ph+E(z)+CtBP</i> RNAi VS. <i>CtBP</i> RNAi | <i>Ph+E(z)+CtBP</i> RNAi VS. <i>Ph+E(z)</i> RNAi |
| PRE ( <i>Antp</i> )           | < 0.0001                | 0.0593                             | 0.0008                               | 0.0949                                    | < 0.0001                                 | 0.9864                                        | < 0.0001                                         |
| Promoter/ PRE ( <i>Antp</i> ) | 0.0015                  | 0.8101                             | 0.0072                               | 0.8124                                    | 0.0025                                   | > 0.9999                                      | 0.0025                                           |
| PRE ( <i>bx</i> )             | 0.0598                  |                                    |                                      |                                           |                                          |                                               |                                                  |
| Promoter ( <i>Ubx</i> )       | 0.0335                  | 0.9877                             | 0.0746                               | 0.9970                                    | 0.0474                                   | 0.9993                                        | 0.0563                                           |
| PRE ( <i>bx<sub>d</sub></i> ) | 0.0051                  | 0.9071                             | 0.0419                               | 0.3714                                    | 0.0168                                   | 0.7212                                        | 0.0043                                           |

**Supplemental Table 4-6.** List of *P* value for data in Figure 5G

|                               | <i>P</i> value of ANOVA | Adjusted <i>P</i> value (post-hoc) |                                      |                                           |                                          |                                               |                                                  |
|-------------------------------|-------------------------|------------------------------------|--------------------------------------|-------------------------------------------|------------------------------------------|-----------------------------------------------|--------------------------------------------------|
|                               |                         | <i>CtBP</i> RNAi VS. Control RNAi  | <i>Ph+E(z)</i> RNAi VS. Control RNAi | <i>Ph+E(z)+CtBP</i> RNAi VS. Control RNAi | <i>Ph+E(z)</i> RNAi VS. <i>CtBP</i> RNAi | <i>Ph+E(z)+CtBP</i> RNAi VS. <i>CtBP</i> RNAi | <i>Ph+E(z)+CtBP</i> RNAi VS. <i>Ph+E(z)</i> RNAi |
| PRE ( <i>Antp</i> )           | 0.0008                  | 0.8396                             | 0.0032                               | 0.9403                                    | 0.0013                                   | 0.9929                                        | 0.0017                                           |
| Promoter/ PRE ( <i>Antp</i> ) | < 0.0001                | 0.2868                             | 0.0005                               | 0.7097                                    | < 0.0001                                 | 0.8277                                        | 0.0002                                           |
| PRE ( <i>bx</i> )             | 0.0082                  | 0.9995                             | 0.0143                               | 0.1989                                    | 0.0123                                   | 0.1713                                        | 0.2996                                           |
| Promoter ( <i>Ubx</i> )       | 0.0177                  | 0.9553                             | 0.0875                               | 0.6447                                    | 0.0428                                   | 0.8974                                        | 0.0166                                           |
| PRE ( <i>bx<sub>d</sub></i> ) | < 0.0001                | > 0.9999                           | < 0.0001                             | 0.5810                                    | < 0.0001                                 | 0.5884                                        | < 0.0001                                         |

**Supplemental Table 4-7.** List of *P* value for data in Figure 6A

|                               | <i>P</i> value of ANOVA | Adjusted <i>P</i> value (post-hoc) |                                      |                                           |                                          |                                               |                                                  |
|-------------------------------|-------------------------|------------------------------------|--------------------------------------|-------------------------------------------|------------------------------------------|-----------------------------------------------|--------------------------------------------------|
|                               |                         | <i>CtBP</i> RNAi VS. Control RNAi  | <i>Ph+E(z)</i> RNAi VS. Control RNAi | <i>Ph+E(z)+CtBP</i> RNAi VS. Control RNAi | <i>Ph+E(z)</i> RNAi VS. <i>CtBP</i> RNAi | <i>Ph+E(z)+CtBP</i> RNAi VS. <i>CtBP</i> RNAi | <i>Ph+E(z)+CtBP</i> RNAi VS. <i>Ph+E(z)</i> RNAi |
| PRE ( <i>Antp</i> )           | 0.0026                  | 0.3579                             | 0.4256                               | 0.0201                                    | 0.9993                                   | 0.0038                                        | 0.0046                                           |
| Promoter/ PRE ( <i>Antp</i> ) | 0.1409                  |                                    |                                      |                                           |                                          |                                               |                                                  |
| PRE ( <i>bx</i> )             | 0.2257                  |                                    |                                      |                                           |                                          |                                               |                                                  |
| Promoter ( <i>Ubx</i> )       | 0.0200                  | 0.9996                             | 0.0175                               | 0.9807                                    | 0.0458                                   | 0.9948                                        | 0.0681                                           |
| PRE ( <i>bx<sub>d</sub></i> ) | 0.0502                  |                                    |                                      |                                           |                                          |                                               |                                                  |

**Supplemental Table 4-8.** List of *P* value for data in Figure 6B

|                               | <i>P</i> value of ANOVA | Adjusted <i>P</i> value (post-hoc) |                                      |                                           |                                          |                                               |                                                  |
|-------------------------------|-------------------------|------------------------------------|--------------------------------------|-------------------------------------------|------------------------------------------|-----------------------------------------------|--------------------------------------------------|
|                               |                         | <i>CtBP</i> RNAi VS. Control RNAi  | <i>Ph+E(z)</i> RNAi VS. Control RNAi | <i>Ph+E(z)+CtBP</i> RNAi VS. Control RNAi | <i>Ph+E(z)</i> RNAi VS. <i>CtBP</i> RNAi | <i>Ph+E(z)+CtBP</i> RNAi VS. <i>CtBP</i> RNAi | <i>Ph+E(z)+CtBP</i> RNAi VS. <i>Ph+E(z)</i> RNAi |
| PRE ( <i>Antp</i> )           | 0.0063                  | 0.7589                             | 0.0110                               | 0.7066                                    | 0.0064                                   | 0.3263                                        | 0.1239                                           |
| Promoter/ PRE ( <i>Antp</i> ) | 0.0012                  | 0.7908                             | 0.0022                               | 0.2196                                    | 0.0017                                   | 0.0975                                        | 0.1203                                           |
| PRE ( <i>bx</i> )             | 0.7469                  |                                    |                                      |                                           |                                          |                                               |                                                  |
| Promoter ( <i>Ubx</i> )       | 0.7708                  |                                    |                                      |                                           |                                          |                                               |                                                  |
| PRE ( <i>bx<sub>d</sub></i> ) | < 0.0001                | 0.9765                             | < 0.0001                             | 0.1845                                    | < 0.0001                                 | 0.4430                                        | < 0.0001                                         |

For each loci, data were analyzed by one-way ANOVA, followed by Tukey's multiple comparison tests.
